# Supplementary material for: On the efficiency of HIV transmission: Insights through discrete time HIV models
Source: PubMed Central journal article supplement (PMC6750597; doi:10.1371/journal.pone.0222574), 2019-09-18
Supplement: pone.0222574.s001.pdf [file pone.0222574.s001.pdf]

# On the efficiency of HIV transmission: Insights through discrete time HIV models

Showa SP, Nyabadza F. and Hove-Musekwa SD.

## Appendix

### Basic properties of the cell free viral spread model

The cell-free viral spread model is given by the following system of equations;

$$D_{t+1} = \beta_1 V_t, \quad (1)$$

$$P_{t+1} = \theta_1 D_t + \theta_3 P_t, \quad (2)$$

$$Q_{t+1} = \theta_2 P_t + \theta_3 Q_t, \quad (3)$$

$$V_{t+1} = \theta_2 \phi Q_t T_t^*, \quad (4)$$

$$T_{t+1} = s_T + \gamma T_t \exp\left(-\frac{T_t + T_t^*}{K} - \beta_1 V_t\right), \quad (5)$$

$$T_{t+1}^* = T_t [1 - \exp(-\beta_1 V_t)] + (1 - \mu) T_t^*, \quad (6)$$

The system of equations (1)-(6) will be studied in a biologically feasible region. We begin by showing that the solutions of this system of equations are bounded.

**Proposition 1.** *The system of equations (1)-(6) is bounded.*

*Proof.* For any  $t_0 \in \mathbb{Z}^+$ , eq (5), gives

$$\begin{aligned} T_{t_0+1} &\leq s_T + \gamma T_{t_0} \exp\left(-\frac{T_{t_0}}{K}\right), \\ &\leq s_T + \gamma K \exp(-1), \end{aligned} \quad (7)$$

where we have used  $\max_{x \in \mathbb{R}} x \exp(-x/K) = K \exp(-1)$ . We claim that

$$T_t \leq s_T + \gamma K \exp(-1) \quad \text{for } t \geq t_0.$$

We prove this by contradiction. Assume that there exist a number  $\bar{l}_0 > t_0$  such that  $T_{\bar{l}_0} > s_T + \gamma K \exp(-1)$ . Then  $\bar{l}_0 \geq t_0 + 2$ . From the previous argument we have

$$\begin{aligned} T_{\bar{l}_0} &\leq s_T + \gamma T_{\bar{l}_0-1} \exp\left(-\frac{T_{\bar{l}_0-1}}{K}\right), \\ &\leq s_T + \gamma K \exp(-1), \end{aligned} \quad (8)$$

which is a contradiction.

From eq (6), it can be deduced that,

$$\begin{aligned} T_{t+1}^* &\leq T_t + (1 - \mu)T_t^* \\ &\leq s_T + \gamma K \exp(-1) + (1 - \mu)T_t^*. \end{aligned}$$

The solution of  $T_{t+1}^* = s_T + \gamma K \exp(-1) + (1 - \mu)T_t^*$  is given by

$$T_t^* = (1 - \mu)^t T_0^* + (s_T + \gamma K \exp(-1)) \sum_{i=0}^{t-1} (1 - \mu)^i.$$

However,  $\sum_{i=0}^{t-1} (1 - \mu)^i$  is a geometric series such that

$$T_t^* = \begin{cases} (1 - \mu)^t T_0^* + (s_T + \gamma K \exp(-1)) \left( \frac{1 - (1 - \mu)^t}{\mu} \right) & \text{if } (1 - \mu) \neq 1, \\ T_0^* + (s_T + \gamma K \exp(-1))t & \text{if } (1 - \mu) = 1. \end{cases}$$

The parameter  $\mu \neq 0$  and thus we have

$$T_t^* \leq (1 - \mu)^t T_0^* + (s_T + \gamma K \exp(-1)) \left( \frac{1 - (1 - \mu)^t}{\mu} \right).$$

In this case

$$\limsup_{t \rightarrow \infty} T_t^* \leq \frac{s_T + \gamma K \exp(-1)}{\mu}.$$

If we let

$$n(t) = \begin{pmatrix} T_t & T_t^* \end{pmatrix}' \text{ and } \hat{n} = \begin{pmatrix} s_T + \gamma K \exp(-1) & \frac{s_T + \gamma K \exp(-1)}{\mu} \end{pmatrix}',$$

then

$$n(t) \leq \hat{n} \text{ for all } t.$$

Observe that

$$N(t+1) \leq \hat{A}N(t), \tag{9}$$

where

$$\hat{A} = \begin{pmatrix} 0 & 0 & 0 & \beta_1 \\ \theta_1 & \theta_3 & 0 & 0 \\ 0 & \theta_2 & \theta_3 & 0 \\ 0 & 0 & \theta_2 \phi \frac{s_T + \gamma K \exp(-1)}{\mu} & 0 \end{pmatrix}.$$

Define

$$N_1(t+1) = \hat{A}N_1(t), \quad t > 0, \quad N_1(0) = \hat{A}N(0),$$

then

$$N_1(t) = \hat{A}^t N_1(0).$$

The spectral radius of  $\hat{A}$ , is less than 1, and thus  $N_1(t)$ , is decreasing sequence. This means that  $\hat{A}^t N_1(0) \rightarrow \mathbf{0}$ , as  $t \rightarrow \infty$ , where  $\mathbf{0} = \begin{pmatrix} 0 & 0 & 0 & 0 \end{pmatrix}$ . We therefore get that

$$\liminf_{t \rightarrow \infty} N_1(t) \geq \mathbf{0} \quad (10)$$

From equality (9) and (10), it can be seen that  $\mathbf{0} \leq N(t) \leq N_1(0)$ .  $\square$

We thus have the following proposition.

**Proposition 2.** *The set defined by*

$$\Omega = \{N(t), n(t) \in \mathbb{R}_+^4 \times \mathbb{R}_+^2 : \mathbf{0} \leq N(t) \leq N_1(0), \bar{\mathbf{0}} \leq n(t) \leq \hat{n}\},$$

where  $\bar{\mathbf{0}} = \begin{pmatrix} 0 & 0 \end{pmatrix}$ , is positively invariant under the flows of the system of equations (1)-(6).

### Fixed points

The equilibrium points (fixed points) are obtained by equating the right hand side to the left hand side of the system of equations (1)-(6). If we denote the equilibrium point by

$\left( D^*, P^*, Q^*, V^*, T^*, T^{**} \right)'$ , we have the following system of equations

$$D^* = \beta_1 V^*, \quad (11)$$

$$P^* = \theta_1 D^* + \theta_3 P^*, \quad (12)$$

$$Q^* = \theta_2 P^* + \theta_3 Q^*, \quad (13)$$

$$V^* = \theta_2 \phi Q^* T^{**}, \quad (14)$$

$$T^* = s_T + T^* \gamma \exp\left(-\beta_1 V^* - \frac{T^* + T^{**}}{K}\right), \quad (15)$$

$$T^{**} = T^* (1 - \exp(-\beta_1 V^*)) + (1 - \mu) T^{**}. \quad (16)$$

Substituting eq (11) into eq (12) we have

$$P^* = \frac{\theta_1}{1 - \theta_3} (\beta_1 V^*). \quad (17)$$

Eq (17) into eq (13) result in

$$Q^* = \frac{\theta_1 \theta_2}{(1 - \theta_3)^2} (\beta_1 V^*). \quad (18)$$

Substituting eq (18) into eq (14) we have

$$V^* = \frac{\theta_1 \theta_2^2 \phi}{(1 - \theta_3)^2} (\beta_1 V^*) T^{**}. \quad (19)$$

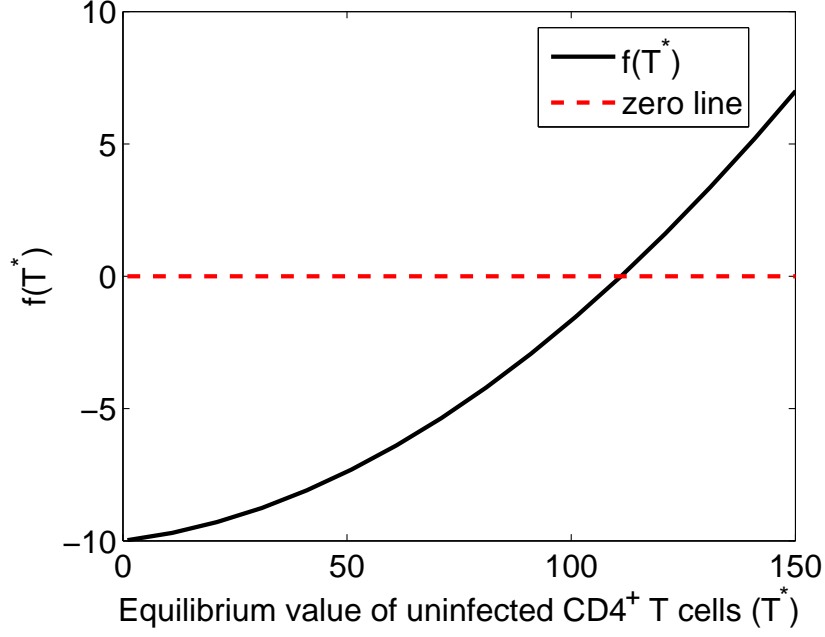

Figure 1: A graph of  $f(T^*)$  against  $T^*$ . The parameters used were  $s_T = 10$ ,  $K = 1500$ ,  $\gamma = 2.7$ . It can be seen that the graph of  $f(T^*)$  crosses the x-axis and thus there is solution for this parameter set.

From eq (19), we get  $V^* = 0$ , which gives the disease free equilibrium point or  $T^{**} = \frac{(1-\theta_3)^2}{\theta_1\theta_2^2\phi\beta_1}$ . Substituting  $V^* = 0$  into equations (11)-(16) we get the disease free equilibrium

$$E_0 = \left( 0, 0, 0, 0, T^*, 0 \right)',$$

where  $T^*$  is a solution of

$$T^* - s_T - T^*\gamma \exp\left(-\frac{T^*}{K}\right) = 0. \quad (20)$$

The analytical solution to the eq (20) is complex therefore, the graphical method is used to show the existence of the solution. Let  $f(T^*) = T^* - s_T - T^*\gamma \exp\left(-\frac{T^*}{K}\right)$ , then the graph of  $f(T^*)$  against  $T^*$  is given in Figure 1. It can be seen from Figure 1 that the graph of  $f(T^*)$  crosses the x-axis and thus there is a solution to the eq (20) for this parameter set.

From eq (16) we have

$$1 - \frac{\mu T^{**}}{T^*} = \exp(-\beta_1 V^*). \quad (21)$$

Substituting eq (21) into (15) result in

$$s_T - T^* + T^* \gamma \left( 1 - \frac{\mu T^{**}}{T^*} \right) \exp\left(-\frac{T^*}{K}\right) = 0, \quad (22)$$

which can be simplified to give

$$s_T - T^* + \gamma (T^* - \mu T^{**}) \exp\left(-\frac{T^* + T^{**}}{K}\right) = 0, \quad (23)$$

where  $T^{**} = \frac{(1-\theta_3)^2}{\theta_1 \theta_2^2 \phi \beta_1}$ .

### Stability of fixed points

The following theorem in [1] is used to study stability of the equilibrium points.

**Theorem 1.** *A fixed point  $x^*$  of a function  $f(x)$  is asymptotically stable if all the eigenvalues  $\mu$  of the first derivative,  $Df(x)$  of  $f(x)$  at  $x^*$  satisfy  $|\mu| < 1$ . The fixed point  $x^*$  is unstable if there exists an eigenvalue  $\mu$  such that  $|\mu| > 1$ .*

**Proposition 3.** *The disease free equilibrium point*

$$E_0 = \left( 0, 0, 0, 0, T^*, 0 \right)',$$

*exist and is locally asymptotically stable when*

$$\left| \gamma \left( 1 - \frac{T^*}{K} \right) \exp\left(-\frac{T^*}{K}\right) \right| < 1,$$

*where  $T^*$  is the solution of eq (20).*

*Proof.* Existence has been proved in the previous section. The Jacobian matrix at this equilibrium is given by

$$J_0 = \begin{pmatrix} 0 & 0 & 0 & \beta_1 & 0 & 0 \\ \theta_1 & \theta_3 & 0 & 0 & 0 & 0 \\ 0 & \theta_2 & \theta_3 & 0 & 0 & 0 \\ 0 & 0 & 0 & 0 & 0 & 0 \\ 0 & 0 & 0 & M & G1 & 0 \\ 0 & 0 & 0 & -\beta_1 T^* & 0 & 1 - \mu \end{pmatrix},$$

where

$$M = -\beta_1 \gamma T^* \exp\left(-\frac{T^*}{K}\right),$$

and

$$G1 = \gamma \left(1 - \frac{T^*}{K}\right) \exp\left(-\frac{T^*}{K}\right).$$

All the eigenvalues  $J_0$  (0 twice,  $\theta_3$  twice, G1 and  $1 - \mu$ ) have magnitudes less than one if  $|G1| < 1$ . This completes the proof.  $\square$

**Proposition 4.** *The system of equations (1)-(6), does not have an endermic equilibrium point for biologically feasible parameters.*

## Basic properties of the cell-associated viral spread model

The cell-associated viral spread model is given by the following system of equations;

$$D_{t+1} = \beta_2 T_t^*, \quad (24)$$

$$P_{t+1} = \theta_1 D_t + \theta_3 P_t, \quad (25)$$

$$Q_{t+1} = \theta_2 P_t + \theta_3 Q_t, \quad (26)$$

$$V_{t+1} = \theta_2 \phi Q_t T_t^*, \quad (27)$$

$$T_{t+1} = s_T + \gamma T_t \exp\left(-\beta_2 T_t^* - \frac{T_t + T_t^*}{K}\right), \quad (28)$$

$$T_{t+1}^* = T_t (1 - \exp(-\beta_2 T_t^*)) + (1 - \mu) T_t^*. \quad (29)$$

**Proposition 5.** *The solutions of the system of equations (24)-(29) remain non negative and are bounded. The set  $\Theta$  defined by  $\Theta = \{N(t), n(t) \in \mathbb{R}^4 \times \mathbb{R}^2 : \mathbf{0} \leq N(t) \leq (I - \bar{G})^{-1} B \bar{n}, \bar{\mathbf{0}} \leq n(t) \leq \bar{n}\}$ , where  $\bar{n} = \left( s_T + \gamma K \exp(-1) \quad \frac{s_T + \gamma K \exp(-1)}{\mu} \right)'$ ,  $\mathbf{0} = \left( 0, 0, 0, 0 \right)'$ ,  $\bar{G} = \begin{pmatrix} 0 & 0 & 0 & 0 \\ \theta_1 & \theta_3 & 0 & 0 \\ 0 & \theta_2 & \theta_3 & 0 \\ 0 & 0 & \theta_2 \phi \frac{s_T + \gamma K \exp(-1)}{\mu} & 0 \end{pmatrix}$  and  $\bar{\mathbf{0}} = \left( 0, 0 \right)'$  is positively invariant with respect to the flows of the system of equations (24)-(29).*

*Proof.* Using the procedure used to prove Proposition 1, it can easily be shown that

$$n(t) \leq \bar{n}$$

where

$$\bar{n} = \left( s_T + \gamma K \exp(-1) \quad \frac{s_T + \gamma K \exp(-1)}{\mu} \right)'.$$

Substituting inequality (9) and  $\bar{n}$  into equation of the virus at its different stages of the life cycle, yields

$$N(t+1) \leq \bar{G}N(t) + B\bar{n}. \quad (30)$$

We can prove by induction that  $N(t) \leq \bar{G}^t N(0) + \sum_{i=0}^{t-1} (\bar{G}^i B\bar{n})$ . It can then be shown that

$$\limsup_{t \rightarrow \infty} N(t) \leq (I - \bar{G})^{-1} B\bar{n}.$$

□

### Equilibrium points

The equilibrium points (fixed points) are obtained by equating the right hand side to the left hand side of the system of equations (24)-(29). If we denote the equilibrium point by  $(D, P, Q, V, T, T^*)'$ , we have the following system of equations

$$D = \beta_2 T^*, \quad (31)$$

$$P = \theta_1 D + \theta_3 P, \quad (32)$$

$$Q = \theta_2 P + \theta_3 Q, \quad (33)$$

$$V = \theta_2 \phi Q T^*, \quad (34)$$

$$T = s_T + T\gamma \exp\left(-\beta_2 T^* - \frac{T + T^*}{K}\right), \quad (35)$$

$$T^* = T(1 - \exp(-\beta_2 T^*)) + (1 - \mu)T^*. \quad (36)$$

Substituting eq (31) into eq (32) we have

$$P = \frac{\theta_1}{1 - \theta_3} (\beta_2 T^*). \quad (37)$$

Eq (37) into eq (33) result in

$$Q = \frac{\theta_1 \theta_2}{(1 - \theta_3)^2} (\beta_2 T^*). \quad (38)$$

Substituting eq (38) into eq (34) we have

$$V = \frac{\theta_1 \theta_2^2 \phi}{(1 - \theta_3)^2} (\beta_2 T^*) T^*. \quad (39)$$

$V = 0$  in (39) implies  $T^* = Q = P = 0$ . Substituting  $T^* = 0$  into equations (35) and (36) and solving the two equation for  $T$ , we get  $T$  which is a solution of equation

$$T - s_T - T\gamma \exp\left(-\frac{T}{K}\right) = 0. \quad (40)$$

**Proposition 6.** *The disease free equilibrium point exist and is locally asymptotically stable for*

$$\left| \gamma \left( 1 - \frac{T}{K} \right) \exp \left( -\frac{T}{K} \right) \right| < 1$$

and

$$|-\beta_2 T + 1 - \mu_T| < 1$$

where  $T$  is a solution of eq (40).

*Proof.* The disease free equilibrium is given by

$$E_1 = \left( 0, 0, 0, 0, T, 0 \right)',$$

where  $T$  is a solution of eq (40).

The Jacobian at  $E_1$  is given by

$$J_{E_1} = \begin{pmatrix} 0 & 0 & 0 & 0 & 0 & \beta_2 \\ \theta_1 & \theta_3 & 0 & 0 & 0 & 0 \\ 0 & \theta_2 & \theta_3 & 0 & 0 & 0 \\ 0 & 0 & 0 & 0 & 0 & 0 \\ 0 & 0 & 0 & 0 & G1 & -\gamma\beta_2 T \exp(-\frac{T}{K}) \\ 0 & 0 & 0 & 0 & 0 & -\beta_2 T + 1 - \mu_T \end{pmatrix}.$$

All the eigenvalues of  $J_{E_1}$ , (0 (twice),  $G1$ ,  $\theta_3$  (twice) and  $-\beta_2 T^* + 1 - \mu$ ) have magnitudes less than one if and only if  $|G1| < 1$  and  $|-\beta_2 T + 1 - \mu_T| < 1$ .  $\square$

The disease equilibrium point is obtained by equating the right hand side to the left hand side of the system of equations (24)-(29). If we denote the equilibrium point by  $\left( D^*, P^*, Q^*, V^*, T^*, T^{**} \right)$  we have the following system of equations

$$D^* = \beta_2 T^{**}, \tag{41}$$

$$P^* = \theta_1 D^* + \theta_3 P^*, \tag{42}$$

$$Q^* = \theta_2 P^* + \theta_3 Q^*, \tag{43}$$

$$V^* = \theta_2 \phi Q^* T^{**}, \tag{44}$$

$$T^* = s_T + T^* \gamma \exp \left( -\beta_2 T^{**} - \frac{T^* + T^{**}}{K} \right), \tag{45}$$

$$T^{**} = T^* (1 - \exp(-\beta_2 T^{**})) + (1 - \mu) T^{**}. \tag{46}$$

Substituting eq (41) into eq (42) we have

$$P^* = \frac{\theta_1}{1 - \theta_3} (\beta_2 T^{**}). \tag{47}$$



Substituting eq (47) into eq (43) result in

$$Q^* = \frac{\theta_1 \theta_2}{(1 - \theta_3)^2} (\beta_2 T^{**}). \quad (48)$$

Substituting eq (48) into eq (44) we have

$$V^* = \frac{\theta_1 \theta_2^2 \phi}{(1 - \theta_3)^2} (\beta_2 T^{**}) T^{**}. \quad (49)$$

Making  $T^*$  subject of formula in eq (46) we get

$$T^* = \frac{\mu T^{**}}{1 - \exp(-\beta_2 T^{**})}. \quad (50)$$

Substituting this expression of  $T^*$  into eq (45) and simplifying the resulting equation we get

$$\mu T^{**} - s_T (1 - \exp(-\beta_2 T^{**})) - \gamma \mu T^{**} \exp\left(-\beta_2 T^{**} - \frac{\mu T^{**}}{K(1 - \exp(-\beta_2 T^{**}))} - \frac{T^{**}}{K}\right) = 0. \quad (51)$$

Solving for  $T^{**}$  is complex and we resort to graphical solutions. We let

$$f(T^{**}) = \mu T^{**} - s_T (1 - \exp(-\beta_2 T^{**})) - \gamma \mu T^{**} \exp\left(-\beta_2 T^{**} - \frac{\mu T^{**}}{K(1 - \exp(-\beta_2 T^{**}))} - \frac{T^{**}}{K}\right). \quad (52)$$

## The cell-free and cell-associated viral spread model

The model that considers both forms transmission takes the form;

$$D_{t+1} = \beta_1 V_t + \beta_2 T_t^*, \quad (53)$$

$$P_{t+1} = \theta_1 D_t + \theta_3 P_t, \quad (54)$$

$$Q_{t+1} = \theta_2 P_t + \theta_3 Q_t, \quad (55)$$

$$V_{t+1} = \theta_2 \phi Q_t T_t^*, \quad (56)$$

$$T_{t+1} = s_T + \gamma T_t \exp\left(-\beta_1 V_t - \beta_2 T_t^* - \frac{T_t + T_t^*}{K}\right), \quad (57)$$

$$T_{t+1}^* = T_t (1 - \exp(-\beta_1 V_t - \beta_2 T_t^*)) + (1 - \mu) T_t^*. \quad (58)$$

**Proposition 7.** *The system of equations (53)-(58) has a disease free equilibrium point given by*

$$E_3 = \left( 0, 0, 0, 0, T^*, 0 \right)',$$

where  $T^*$  is a solution of eq (20).

The Jacobian matrix at  $E_3$  is given by

$$J_{E_3} = \begin{pmatrix} 0 & 0 & 0 & \beta_1 & 0 & \beta_2 \\ \theta_1 & \theta_3 & 0 & 0 & 0 & 0 \\ 0 & \theta_2 & \theta_3 & 0 & 0 & 0 \\ 0 & 0 & 0 & 0 & 0 & 0 \\ 0 & 0 & 0 & -\gamma\beta_1 T^* \exp\left(-\frac{T^*}{K}\right) & G1 & -\gamma\beta_2 T^* \exp\left(-\frac{T^*}{K}\right) \\ 0 & 0 & 0 & -\beta_1 T^* & 0 & -\beta_2 T^* + 1 - \mu \end{pmatrix}.$$

The eigenvalues are 0 (twice),  $\theta_3$  (twice),  $G1$ , and  $-\beta_2 T^* + 1 - \mu$ . All the eigenvalues have magnitudes less than one if and only if  $|G1| < 1$  and  $|-\beta_2 T^* + 1 - \mu| < 1$ . Showing that the system of equations (53)-(58) has an endemic equilibrium is maybe difficult, we use permanence to show the existence of the disease equilibrium.

**Definition 1.** *The system (53)-(58) is permanent if there exist positive constants  $m$  and  $M$  which are independent of the solution of system (53)-(58), such that any positive solution  $\{D_t, P_t, Q_t, V_t, T_t, T_t^*\}$  of system (53)-(58) satisfies*

$$m \leq \liminf_{t \rightarrow \infty} \{D_t, P_t, Q_t, V_t, T_t, T_t^*\} \leq \limsup_{t \rightarrow \infty} \{D_t, P_t, Q_t, V_t, T_t, T_t^*\} \leq M.$$

**Lemma 1.** *Every solution  $\{D_t, P_t, Q_t, V_t, T_t, T_t^*\}$  of system (53)-(58) satisfies  $\limsup_{t \rightarrow \infty} n(t) \leq \bar{n}$  and  $\limsup_{t \rightarrow \infty} N(t) \leq (I - \bar{G})^{-1} B \bar{n}$ , where  $\bar{n}$ ,  $\bar{G}$  are as previously defined.*

*Proof.* From the proof of Proposition 1 we get that

$$\limsup_{t \rightarrow \infty} T_t \leq s_T + \gamma K \exp(-1).$$

Using the same procedure as the one used in proving Proposition 1, we get

$$\limsup_{t \rightarrow \infty} T_t^* \leq \frac{s_T + \gamma K \exp(-1)}{\mu}$$

and

$$\limsup_{t \rightarrow \infty} N(t) \leq (I - \bar{G})^{-1} B \bar{n},$$

where  $\bar{n}$ ,  $\bar{G}$  are as previously defined. □

**Lemma 2.** *Every solution  $\{D_t, P_t, Q_t, V_t, T_t, T_t^*\}$  of system (53)-(58) satisfies  $h \leq \liminf_{t \rightarrow \infty} n(t)$*

$$\text{and } H \leq \liminf_{t \rightarrow \infty} N(t) \text{ where } h = (H_1 \ H_2), \ H = (I - \tilde{G}) B h, \ \tilde{G} = \begin{pmatrix} 0 & 0 & 0 & 0 \\ \theta_1 & \theta_3 & 0 & 0 \\ 0 & \theta_2 & \theta_3 & 0 \\ 0 & 0 & \theta_2 \phi H_2 & 0 \end{pmatrix},$$

$H_1 = \gamma K \exp(-\beta_1 \bar{V} - \beta_2 \bar{T}^* - 1)$  and

$$H_2 = \gamma K \exp(-\beta_1 \bar{V} - \beta_2 \bar{T}^* - 1) \left( 1 - \ln \left( \frac{\mu}{\beta_2 H_1} \right) \right) + \frac{\mu}{\beta_2} \ln \left( \frac{\mu}{\beta_2 H_1} \right).$$

*Proof.* According to Lemma 1, there exist a  $t^* \in \mathbb{Z}^+$ , such that

$$n(t) < \bar{n} + (\epsilon, \epsilon)', \quad N(t) < \bar{N} + (\epsilon, \epsilon, \epsilon, \epsilon)', \quad t \geq t^*$$

where  $\bar{N} = (I - \bar{G})^{-1}B\bar{n}$ . We first show that  $\liminf_{t \rightarrow \infty} T_t \geq H_1$ , where  $H_1$  is to be determined. Assume that there exist a  $t_0 \geq t^*$  such that

$$\begin{aligned} T_{t_0+1} &\geq s_T + \gamma T_{t_0} \exp\left(-\beta_1(\bar{V} + \epsilon) - \beta_2(\bar{T}^* + \epsilon) - \frac{T_{t_0}}{K}\right), \\ &\geq s_T + \gamma T_{t_0} \exp\left(-F - \frac{T_{t_0}}{K}\right), \\ &\geq \gamma T_{t_0} \exp\left(-F - \frac{T_{t_0}}{K}\right), \\ &\geq \gamma K \exp(-F - 1), \end{aligned}$$

where  $-\beta_1(\bar{V} + \epsilon) - \beta_2(\bar{T}^* + \epsilon) = F$ . We claim that

$$T_t \geq K \exp(-F - 1), \quad \text{for } t \geq t_0.$$

By way of contradiction, assume there exist a  $\tau_0 > t_0$  such that  $T_{\tau_0} < \gamma K \exp(-F - 1)$ . Let  $\bar{\tau}_0 = t_0 + 2$  be the smallest number such that  $T_{\bar{\tau}_0} < \gamma K \exp(-F - 1)$ . The argument presented above produces a contradiction and this proves the claim. Thus

$$\liminf_{t \rightarrow \infty} T_t \geq \gamma K \exp(-F - 1).$$

Setting  $\epsilon \rightarrow 0$  leads to

$$\liminf_{t \rightarrow \infty} T_t \geq H_1 = \gamma K \exp(-\beta_1 \bar{V} - \beta_2 \bar{T}^* - 1).$$

We now need to show that  $\liminf_{t \rightarrow \infty} T_t^* \geq H_2$ , where  $H_2$  is to be determined. From the above steps we have that for  $t^* \in \mathbb{Z}^+$ ,

$$n(t) < \bar{n} + (\epsilon, \epsilon)', \quad N(t) < \bar{N} + (\epsilon, \epsilon, \epsilon, \epsilon)',$$

and  $T_t \geq H_1 - \epsilon$ ,  $t \geq t^*$ . Assume that there exist  $t_0 \geq t^*$  such that

$$\begin{aligned} T_{t_0+1}^* &\geq (H_1 - \epsilon) \left(1 - \exp(-\beta_1 V_{t_0} - \beta_2 T_{t_0}^*)\right) + (1 - \mu)T_{t_0}^*, \\ &\geq (H_1 - \epsilon) \left(1 - \exp(-\beta_2 T_{t_0}^*)\right) + (1 - \mu)T_{t_0}^*, \end{aligned} \tag{59}$$

$$\geq (H_1 - \epsilon) \left(1 - \exp(-\beta_2 T_{t_0}^*)\right) - \mu T_{t_0}^*, \tag{60}$$

$$\geq (H_1 - \epsilon) \left(1 - \ln\left(\frac{\mu}{\beta_2(H_1 - \epsilon)}\right)\right) + \frac{\mu}{\beta_2} \ln\left(\frac{\mu}{\beta_2(H_1 - \epsilon)}\right). \tag{61}$$

We claim that

$$T_t^* \geq H1_2, \text{ where } H1_2 = (H_1 - \epsilon) \left( 1 - \ln \left( \frac{\mu}{\beta_2(H_1 - \epsilon)} \right) \right) + \frac{\mu}{\beta_2} \ln \left( \frac{\mu}{\beta_2(H_1 - \epsilon)} \right)$$

for  $t \geq t_0$ .

By way of contradiction assume there exists a  $\tau_0 > t_0$  such that  $T_{\tau_0}^* < H1_2$ , then  $\tau_0 \geq t_0 + 2$ .

Let  $\bar{\tau}_0 = t_0 + 2$  be the smallest number such that  $T_{\bar{\tau}_0}^* < H1_2$ . The above argument produces  $T_{\bar{\tau}_0}^* \leq H1_2$ , a contradiction and this proves the claim. Thus  $\liminf_{t \rightarrow \infty} T_t^* \geq H1_2$ . Setting  $\epsilon \rightarrow 0$  leads to

$$\liminf_{t \rightarrow \infty} T_t \geq H_2 = H_1 \left( 1 - \ln \left( \frac{\mu}{\beta_2 H_1} \right) \right) + \frac{\mu}{\beta_2} \ln \left( \frac{\mu}{\beta_2 H_1} \right)$$

We now show that  $\liminf N(t) \geq H_3$  where  $H_3$  is to be determined. We now have that  $n(t) < \bar{n} + (\epsilon, \epsilon)'$ ,  $N(t) < \bar{N} + (\epsilon, \epsilon, \epsilon, \epsilon)'$ , and  $T_t \geq H_1 - \epsilon$ ,  $T_t^* \geq H_2 - \epsilon$ ,  $t \geq t^*$ .

Define  $\hat{G} = \begin{pmatrix} 0 & 0 & 0 & 0 \\ \theta_1 & \theta_3 & 0 & 0 \\ 0 & \theta_2 & \theta_3 & 0 \\ 0 & 0 & \theta_2 \phi(H_2 - \epsilon) & 0 \end{pmatrix}$ , and  $\hat{n} = (H_1 - \epsilon, H_2 - \epsilon)'$ . For any  $t \geq 0$  we have that

$$N(t+1) = GN(t) + B\hat{n} \tag{62}$$

$$\geq \hat{G}N(t) + B\hat{n} \tag{63}$$

We can prove by induction that  $N(t) \geq \hat{G}^t N(0) + \sum_{i=0}^{t-1} \hat{G}^i B\hat{n}$ , from which it can be deduced that  $\liminf_{t \rightarrow \infty} N(t) \geq (I - \hat{G})B\hat{n}$ . Setting  $\epsilon \rightarrow 0$  leads to  $\liminf_{t \rightarrow \infty} N(t) \geq H_3 = (I - \tilde{G})B\hat{n}$ .  $\square$

**Proposition 8.** *The system of equations (53)-(58) is permanent.*

*Proof.* The result follows from Lemma 1 and Lemma 2.  $\square$

The implication of this result is that an endemic equilibrium point exist.

## References

- [1] Guckenheimer J. and Holmes P. 1983. Nonlinear oscillations, Dynamical systems, and bifurcations of vector fields. Springer-Verlag.
